# Supplementary material for: Genetic Ablation of Pannexin1 Protects Retinal Neurons from Ischemic Injury
Source: PLOS journal article supplement (doi:10.1371/journal.pone.0031991), 2012-02-23
Supplement: S4 (10.1371/journal.pone.0031991.s004) [file journal.pone.0031991.s004]

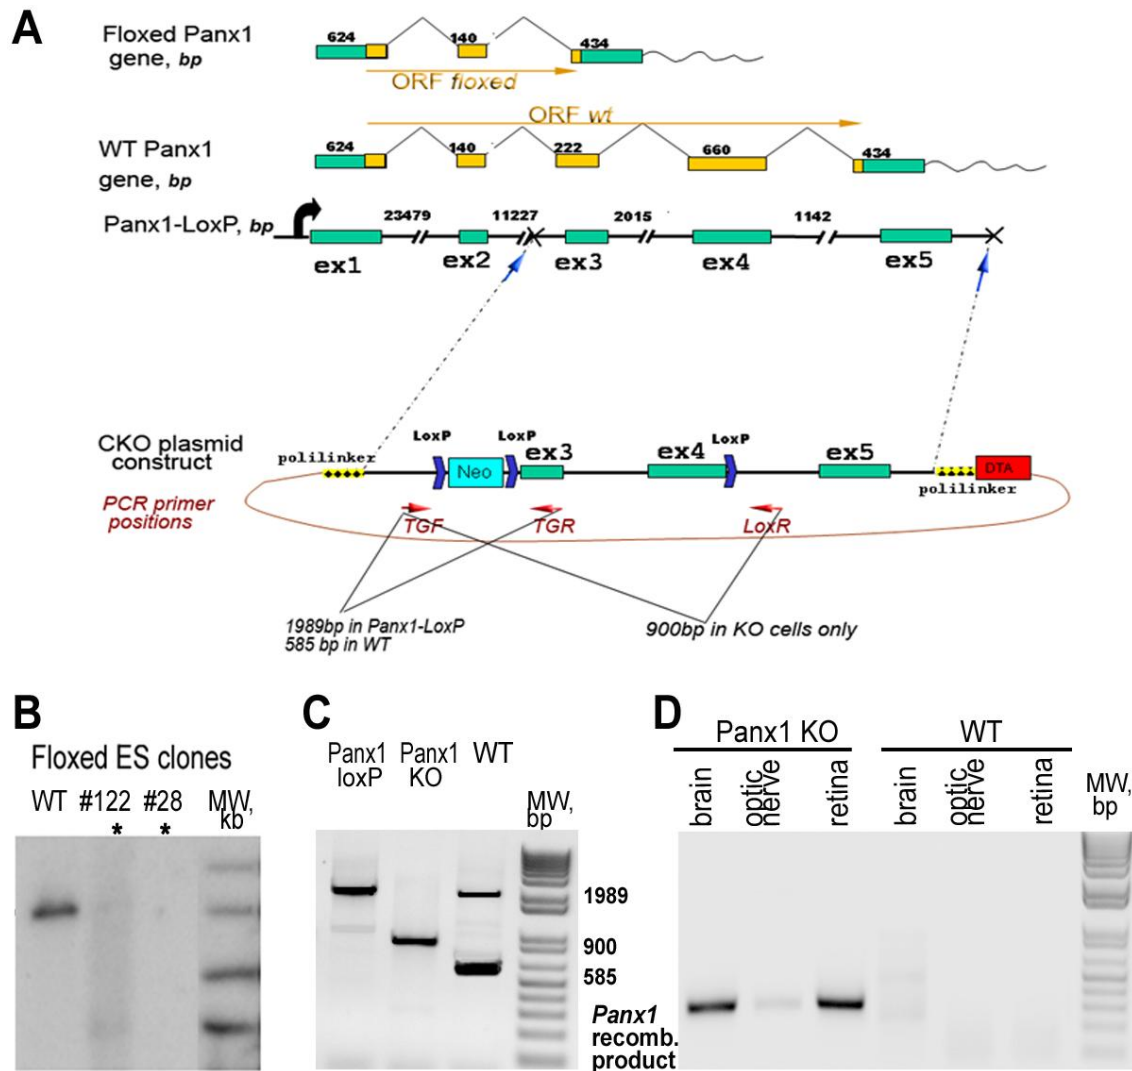

**Supplement Figure S1. Panx1 conditional knockout construct.** **A.** The knockout construct design. The fragment containing Exons 3-5 was flanked by LoxP sites, the Neo resistance selection marker at the left shoulder and DTA "suicide" gene, was inserted into C129 ES cells by homologous recombination. Cre-recombination of the recombinant Panx1 gene eliminates the entire LoxP flanked region. **B.** Southern Blot analysis of floxed ES clones for the Panx1 transcript removal. **C.** PCR-genotyping Panx1/LoxP and CMV-Cre/Panx1 mice (Panx1 KO). **D.** PCR detection of recombined functionally deficient floxed Panx1 transcript in the tissues of CMV-cre/Panx1 (Panx1 KO) and WT mice, using a set of 2 primers.
