# Supplementary material for: Genetic Ablation of Pannexin1 Protects Retinal Neurons from Ischemic Injury
Source: PLOS journal article supplement (doi:10.1371/journal.pone.0031991), 2012-02-23
Supplement: S5 (10.1371/journal.pone.0031991.s005) [file journal.pone.0031991.s005]

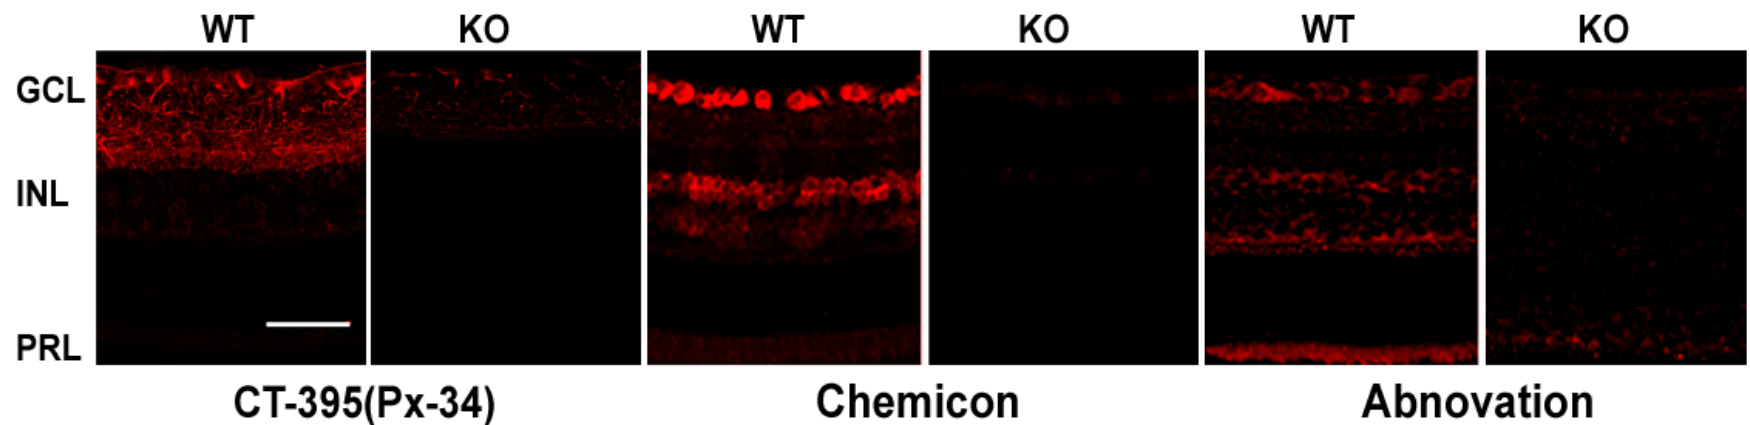

**Supplement Figure S2. Immunohistochemical detection of the Panx1 protein** (red) in wild type (WT) and Panx1 KO (KO) retinal slices using different C-terminal antibodies. All three antibodies showed brightest labeling in the ganglion cell layer (GCL) of WT retinas and near-complete lack of labeling in the retinas of Panx1 KO animals. Minor labeling is also present in inner nuclear (INL) and photoreceptor (PRL) layers. The CT-395 antibodies showed some residual immunostaining in Panx1 KO retinal tissues that localized to RGC dendrites. Scale bar, 50  $\mu$ m
