# Supplementary material for: Genetic Ablation of Pannexin1 Protects Retinal Neurons from Ischemic Injury
Source: PLOS journal article supplement (doi:10.1371/journal.pone.0031991), 2012-02-23
Supplement: S8 (10.1371/journal.pone.0031991.s008) [file journal.pone.0031991.s008]

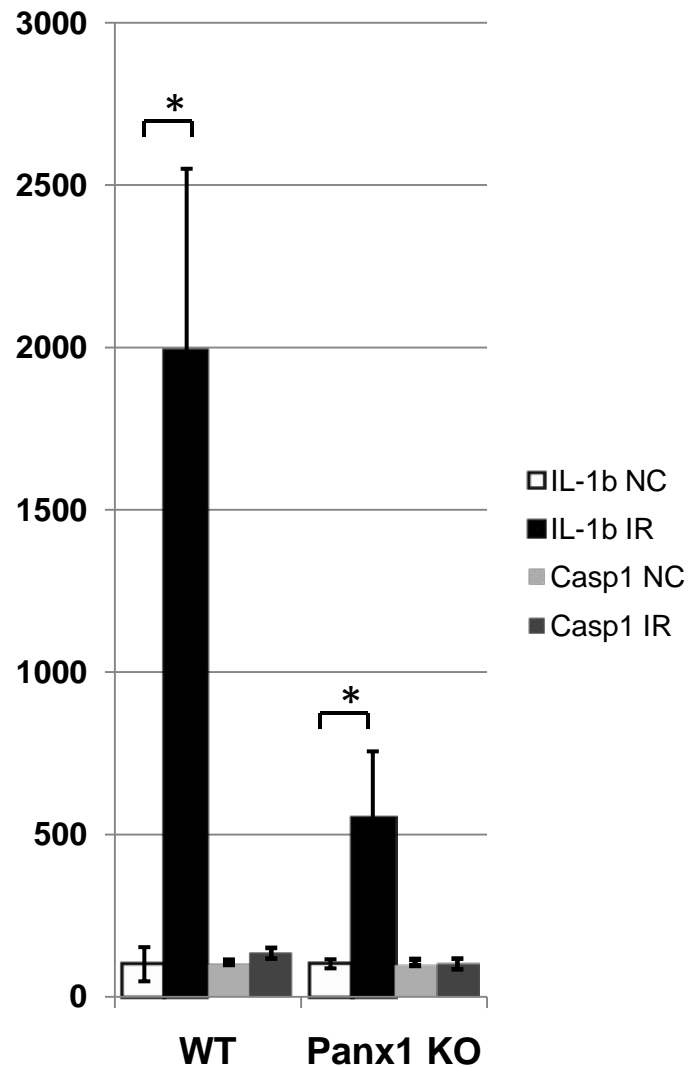

**Supplement Figure S5. Differential activation of the *Il1b* gene in WT vs. Panx1 KO retinal in response to IR.** Gene expression analysis in whole retina from ischemic (IR, sampled 3 hours after reperfusion) and normotensive sham-operated control (NC) eyes performed by quantitative PCR. Relative abundances of the *Il1b* and *Casp1* transcripts in total extracts from WT and Panx1 KO retinas normalized to the levels of  $\beta$ -actin transcript; data are presented as mean  $\pm$  SD. Asterisk indicates  $P < 0.05$ . The up-regulation of the *Il1b*, but not *Casp1* gene was significantly suppressed in Panx1 KO vs. WT retinas challenged by IR.
