# Supplementary material for: Genetic Ablation of Pannexin1 Protects Retinal Neurons from Ischemic Injury
Source: PLOS journal article supplement (doi:10.1371/journal.pone.0031991), 2012-02-23
Supplement: S10 (10.1371/journal.pone.0031991.s010) [file journal.pone.0031991.s010]

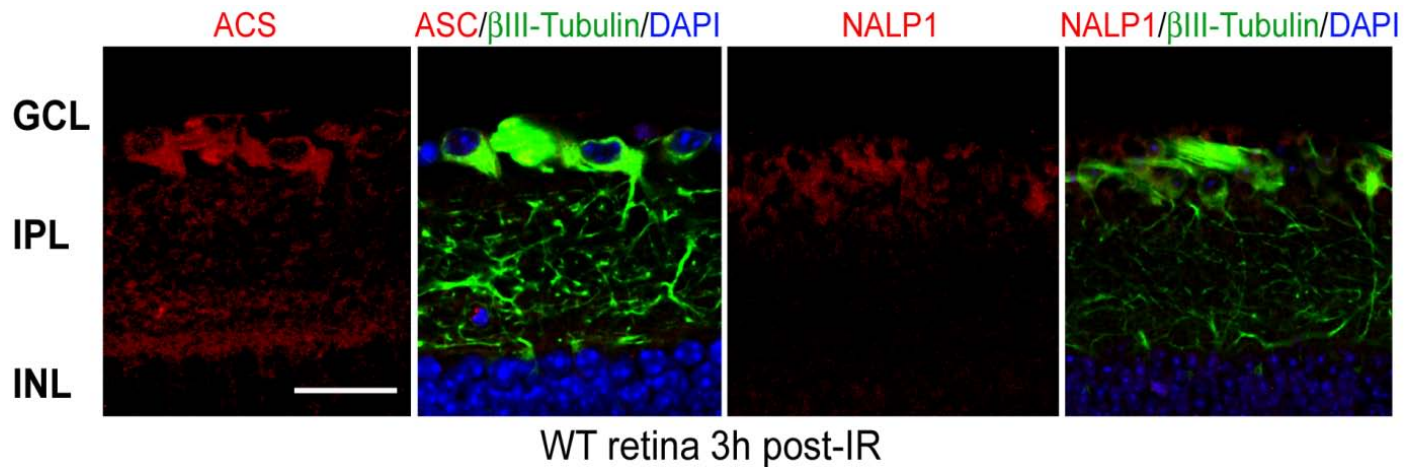

**Supplement Figure S7. Co-localization analysis of inflammasome marker proteins ASC and NALP1 in the mouse retina at 3h post-IR.** Arrows indicate cells co-localizing staining for RGC-specific marker III $\beta$ -Tubulin with the labeling specific to ASC and NALP1 proteins. DAPI staining for nucleic acid is in blue; scale bar, 50  $\mu$ m
